# Supplementary material
Source: PubMed Central journal article supplement (PMC170970)
Supplement: pnas_1530303100_1.pdf [file pnas_1530303100_1.pdf]

## Mathematical Appendix

Let  $1 = R$  denote the renewal equation (Eq. 3 in Appendix) and  $0 = B$  denote the balance equation (Eq. 4 in Appendix). Let  $R'$  and  $B'$  be partial derivatives with respect to  $\gamma$ , holding  $r$  constant; let  $r'_R$  and  $r'_B$  be partial derivatives with respect to  $\gamma$ , holding  $\pi$  constant for  $r'_B$ .

$$r'_R = \frac{R'}{A_m} = \frac{1}{A_m} \int_0^{\omega} e^{-rx} \left\{ \frac{\partial l(x)}{\partial \gamma} m(x) + \frac{\partial m(x)}{\partial \gamma} l(x) \right\} dx \quad [\text{A1}]$$

$$r'_B = \frac{B'}{C(A_y - A_c)} = \frac{1}{C(A_y - A_c)} \int_0^{\omega} e^{-rx} \frac{\partial l(x, \gamma)}{\partial \gamma} \left[ \pi \left( \frac{E}{N} \right) y(x, \gamma) - c(x, \gamma) \right] dx \quad [\text{A2}]$$

$$+ \int_0^{\omega} e^{-rx} l(x, \gamma) \left[ \pi \left( \frac{E}{N} \right) \frac{\partial y(x, \gamma)}{\partial \gamma} - \frac{\partial c(x, \gamma)}{\partial \gamma} \right] dx$$

$A_y$  and  $A_m$  are calculated similarly to  $A_c$ :

$$A_c = \frac{\int_0^{\omega} x e^{-rx} l(x, \gamma) c(x, \gamma) dx}{\int_0^{\omega} e^{-rx} l(x, \gamma) c(x, \gamma) dx} \quad [\text{A3}]$$

The denominator in **A3** is  $C$ , the discounted lifetime value of consumption, which must equal the similarly calculated  $\pi Y$ .

**Fertility.** Differentiate  $R = 1$  and  $B = 0$ , and simplify to find

$$\frac{dr}{d\varepsilon(a)} = e^{-ra} l(a) / A_m + r'_R \frac{d\gamma}{d\varepsilon(a)} \quad [\text{A4}]$$

$$\frac{dr}{d\varepsilon(a)} = r'_B \frac{d\gamma}{d\varepsilon(a)} \quad [\text{A5}]$$

Substitute out  $d\gamma/d\varepsilon(a)$  and solve for  $dr/d\varepsilon(a)$  to find Eq. 5 in Appendix.

**Mortality.** Differentiate  $R = 1$  and  $B = 0$ , and simplify to find

$$\frac{dr}{d\delta(a)} = \frac{d\gamma}{d\delta(a)} r'_R + F(a) / A_m \quad [\text{A6}]$$

$$\frac{dr}{d\delta(a)} = T(a)/C(A_y - A_c) + \frac{d\gamma}{d\delta(a)} r'_B \quad [\text{A7}]$$

Substitute out  $d\gamma/d\delta(a)$  and solve for  $dr/d\delta(a)$  to find Eq. 6 in Appendix.
